# Supplementary material
Source: publisher site journal article supplement (https://www.dovepress.com/article/392510)
Supplement: Supplementary file 1 [file get_supplementary_file.php]

**Supplemental Table 1.** Single nucleotide polymorphisms of nucleotide-binding domain leucine-rich repeat (NLRP) 1 protein in adults with or without toxigenic *Clostridioides difficile* colonization (CdC) or infection (CDI).

|  | No CdC or CDI, n=376 | CdC or CDI, n=133 | *P* value |
| --- | --- | --- | --- |
| NLRP1, rs12150220 |  |  | 0.44 |
| AA genotype | 363 (96.5) | 126 (94.7) |  |
| TT+TA genotype | 13 (3.5) | 7 (5.3) |  |
| NLRP1, rs2670660 |  |  | 0.21 |
| AA genotype | 236 (62.8) | 92 (69.2) |  |
| GG+GA | 140 (37.2) | 41 (30.8) |  |
| NLRP1, rs6502867 |  |  | 0.59 |
| TT genotype | 346 (92.0) | 120 (90.2) |  |
| TG+GG genotype | 30 (8.0) | 13 (9.8) |  |
| NLRP1, rs878329 |  |  | 1.00 |
| GG genotype | 242 (64.4) | 86 (64.7) |  |
| CC+GC genotype | 134 (35.6) | 47 (35.3) |  |
| NLRP1, rs8182352 |  |  | 0.83 |
| TT genotype | 241 (64.1) | 87 (65.4) |  |
| TC+CC | 135 (35.9) | 46 (34.6) |  |
| **NLRP1, rs3744717** |  |  | **0.002** |
| CC genotype | 113 (30.1) | 60 (45.1) |  |
| TC+TT genotype | 263 (69.9) | 73 (54.9) |  |

Bold values indicate statistical significance

**Supplemental Table 2.** Clinical characteristics of patients with a single nucleotide polymorphism of rs3744717 in the nucleotide-binding domain leucine-rich repeat 1 (NLRP1) protein.

| Variables | TC+TT, n=336 | CC, n=173 | *P* value |
| --- | --- | --- | --- |
| **Age, years** | **71.5 ± 15.7** | **75.5 ± 13.8** | **0.003** |
| Body-mass index, kg/m2 | 19.6 ± 4.4 | 20.9 ± 15.8 | 0.20 |
| **Gender, male** | **199 (59.2)** | **82 (47.4)** | **0.01** |
| Nursing home resident | 241 (71.7) | 118 (68.2) | 0.41 |
| Recent hospitalization within one month before the hospitalization | 112 (33.3) | 54 (31.2) | 0.69 |
| Comorbidity |  |  |  |
| Hypertension | 161 (47.9) | 88 (50.9) | 0.58 |
| Old stroke | 134 (39.9) | 63 (36.4) | 0.50 |
| Diabetes mellitus | 108 (32.1) | 67 (38.7) | 0.14 |
| Chronic kidney disease | 52 (15.5) | 24 (13.9) | 0.70 |
| Chronic obstructive pulmonary disease | 45 (13.4) | 22 (12.7) | 0.89 |
| Congestive heart failure | 31 (9.2) | 13 (7.5) | 0.62 |
| Coronary artery disease history | 27 (8.0) | 14 (8.1) | 1.00 |
| Malignancy | 22 (6.5) | 14 (8.1) | 0.59 |
| Liver cirrhosis | 5 (1.8) | 1 (0.6) | 0.43 |
| Laboratory data at the first admission |  |  |  |
| Blood leukocyte, x 1,000 cells/mL | 12.4 ± 6.9 | 12.3 ± 5.8 | 0.88 |
| Serum creatinine, mg/L | 2.2 ± 14.5 | 2.5 ± 12.8 | 0.79 |

Data are presented as patient numbers (%) or means ± standard deviations.

Bold values indicate statistical significance
